# Supplementary material for: Characterization of phage resistance and phages capable of intestinal decolonization of carbapenem-resistant Klebsiella pneumoniae in mice
Source: PubMed Central journal article supplement (PMC8758719; doi:10.1038/s42003-022-03001-y), 2022-01-13
Supplement: 42003_2022_3001_MOESM1_ESM.pdf [file 42003_2022_3001_MOESM1_ESM.pdf]

## Supplementary Figure 1

### Characteristics of growth and stability of P24 and P39.

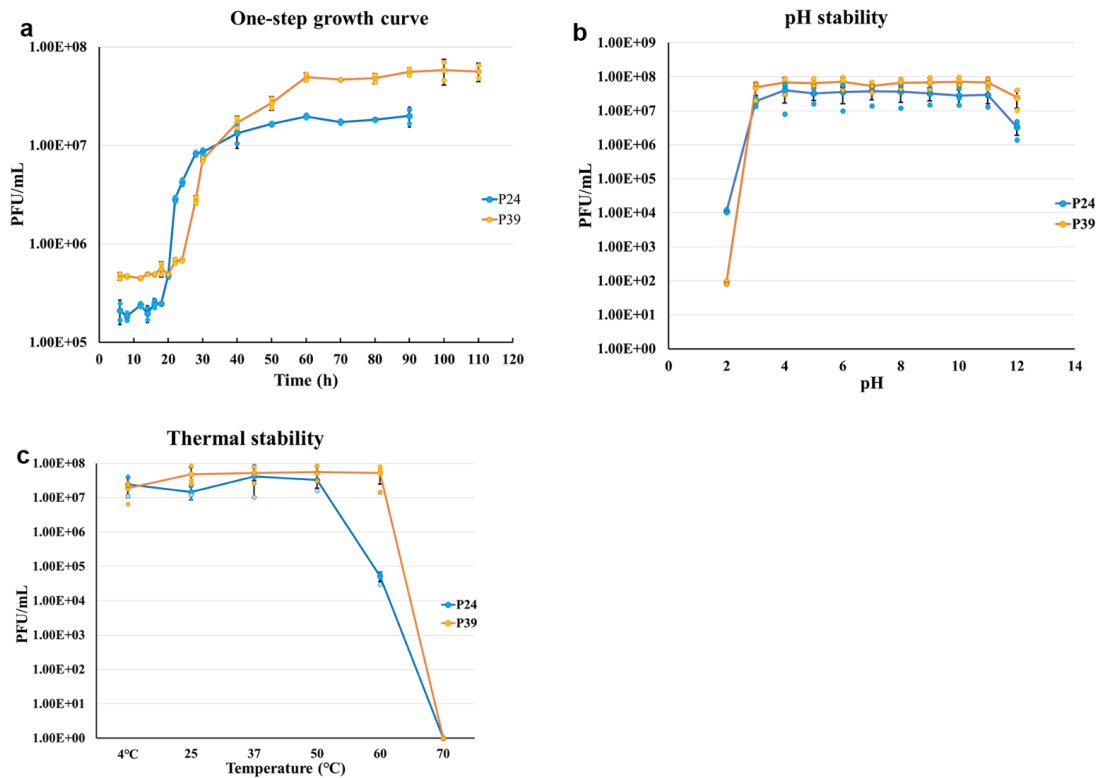

(a) One-step growth curve. The latent period for P24 and P39 was 20 and 25 min, respectively. An average burst size for P24 and P39 was 86 and 107 PFU per infected cell, respectively; (b) Stability of phage under different pH values. Both phages remained relatively stable within a pH range of 3–11 for 1 h. Incubation at pH 2 caused a 3- and 6-log decrease in the phage titer of P24 and P39, respectively; (c) Stability at various temperatures. Both phages remained stable at temperature of 4–50 °C for 1 h. The titer of P24 and P39 declined by 3- and 1-log at 60 °C, respectively. Both phages were completely inactivated at 70 °C. Data are shown mean  $\pm$  SD ( $n = 3$ ) and error bars represent standard deviation. Individual data were shown in colored points. The source results are shown in Supplementary Data 4.

## Supplementary Figure 2

### Phylogenetic trees of P24, P39 and their closely-related phages

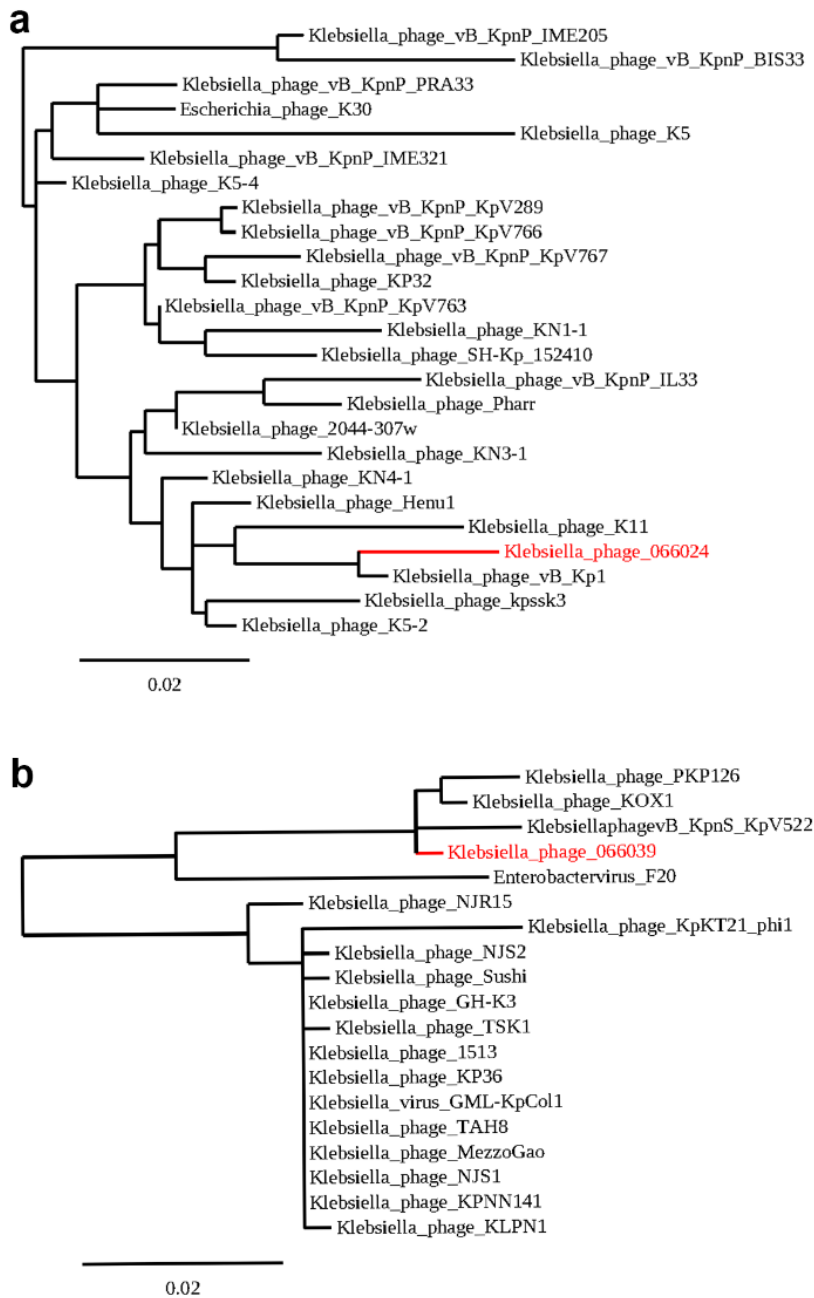

(a) Phylogenetic tree based on the amino acid sequence of the DNA polymerase of P24 (066024) and phages belonging to the genus *Przondovirus* of the *Studiervirinae* subfamily.

(b) Phylogenetic tree based on the amino acid sequence of the major capsid protein of P39 (066039) and phages belonging to the *Webervirus* genus of the family *Drexelviriidae*. The trees were inferred using “One Click” at <http://www.phylogeny.fr/>.

1 **Supplementary Table 1**2 **CRKP strains used in this study and the host range of phages**

| Strains     | Accession No.     | ST | Carbapene-mase genes        | Capsule type | Source      | P24  |        | P39  |        | EOP (%)     |
|-------------|-------------------|----|-----------------------------|--------------|-------------|------|--------|------|--------|-------------|
|             |                   |    |                             |              |             | Spot | Plaque | Spot | Plaque |             |
| B0 (015134) | NWCG00000000      | 11 | <i>bla</i> <sub>KPC-2</sub> | KL64         | Rectal swab | +    | +      | -    | -      | 100         |
| 020037      | CP036371-CP036375 | 11 | <i>bla</i> <sub>KPC-2</sub> | KL64         | Sputum      | +    | +      | -    | -      | 0.1-0.2     |
| 090527      | JAEMHO000000000   | 11 | <i>bla</i> <sub>KPC-2</sub> | KL64         | Ascites     | +    | -      | -    | -      |             |
| 015318      | PWCG00000000      | 11 | <i>bla</i> <sub>KPC-2</sub> | KL64         | Rectal swab | +    | +      | -    | -      | 0.7-0.9     |
| 015584      | QJMQ00000000      | 11 | <i>bla</i> <sub>KPC-2</sub> | KL64         | Rectal swab | +    | +      | -    | -      | 2.3-3.4     |
| 020003      | CP031717-CP031721 | 11 | <i>bla</i> <sub>KPC-2</sub> | KL64         | Urine       | +    | +      | -    | -      | 3.5-4.6     |
| 015785      | JAEMHP000000000   | 11 | <i>bla</i> <sub>KPC-2</sub> | KL64         | Rectal swab | +    | +      | -    | -      | 115.4-230.8 |
| 020030      | CP028788-CP028793 | 11 | <i>bla</i> <sub>KPC-2</sub> | KL47         | Tissue      | -    | -      | -    | -      |             |
| 020143      | CP028543-CP028548 | 11 | <i>bla</i> <sub>KPC-2</sub> | KL47         | Secretion   | -    | -      | -    | -      |             |
| 015712      | JAEMHQ000000000   | 11 | <i>bla</i> <sub>KPC-2</sub> | KL47         | Rectal swab | -    | -      | -    | -      |             |
| 020058      | NWDZ00000000      | 11 | <i>bla</i> <sub>KPC-2</sub> | KL47         | Sputum      | -    | -      | -    | -      |             |
| 020046      | CP028779-CP028783 | 11 | <i>bla</i> <sub>NDM-5</sub> | KL39         | Secretion   | -    | -      | -    | -      |             |
| 015581      | QJMP00000000      | 11 | <i>bla</i> <sub>KPC-2</sub> | KL39         | Rectal swab | -    | -      | -    | -      |             |
| 020077      | NWMY00000000      | 37 | <i>bla</i> <sub>NDM-1</sub> | KL38         | Sputum      | -    | -      | -    | -      |             |
| 020070      | NGZF00000000      | 37 | <i>bla</i> <sub>NDM-1</sub> | KL38         | Sputum      | -    | -      | -    | -      |             |
| 020135      | CP037963-CP037967 | 1  | <i>bla</i> <sub>NDM-1</sub> | KL45         | Sputum      | -    | -      | -    | -      |             |
| 020136      | NWFF00000000      | 1  | <i>bla</i> <sub>NDM-1</sub> | KL45         | Blood       | -    | -      | -    | -      |             |
| 020117      | PWAI00000000      | 45 | <i>bla</i> <sub>NDM-1</sub> | KL5          | Sputum      | -    | -      | -    | -      |             |
| 020035      | CP045988-CP045992 | 45 | <i>bla</i> <sub>KPC-2</sub> | KL62         | Blood       | -    | -      | -    | -      |             |
| 020083      | NOKM00000000      | 15 | <i>bla</i> <sub>NDM-5</sub> | KL106        | Secretion   | -    | -      | -    | -      |             |
| 020052      | PWAS00000000      | 54 | <i>bla</i> <sub>IMP-4</sub> | KL14         | Feces       | -    | -      | -    | -      |             |

P24-resistant mutants

|      |                 |    |                             |      |   |   |   |            |
|------|-----------------|----|-----------------------------|------|---|---|---|------------|
| B1-1 | JADLJA000000000 | 11 | <i>bla</i> <sub>KPC-2</sub> | KL64 | - | + | + | 100        |
| B1-2 | JADLIZ000000000 | 11 | <i>bla</i> <sub>KPC-2</sub> | KL64 | - | + | + | 75-100     |
| B1-3 | JADLIY000000000 | 11 | <i>bla</i> <sub>KPC-2</sub> | KL64 | - | + | + | 66.7-133.3 |

P39-resistant mutants

|      |                 |    |                             |      |   |   |  |  |
|------|-----------------|----|-----------------------------|------|---|---|--|--|
| B2-1 | JAHAWI000000000 | 11 | <i>bla</i> <sub>KPC-2</sub> | KL64 | - | - |  |  |
| B2-2 | JAHKSV000000000 | 11 | <i>bla</i> <sub>KPC-2</sub> | KL64 | - | - |  |  |
| B2-3 | JAHAWJ000000000 | 11 | <i>bla</i> <sub>KPC-2</sub> | KL64 | - | - |  |  |

3 +, phage formed a clear zone or plaque; -, phage form no clear zone nor plaque.

4 **Supplementary Table 2**

5 **Genome information of the two phages in this study**

|                            | P24                       | P39                     |
|----------------------------|---------------------------|-------------------------|
| Genome size                | 40,770 bp                 | 51,633 bp               |
| tRNA                       | 0                         | 0                       |
| GC%                        | 53.04%                    | 51.46%                  |
| Total Proteins             | 50                        | 81                      |
| Proteins of known function | 30                        | 40                      |
| Accession No.              | MW042792.1                | MW042802.1              |
| Classification             | <i>Przondovirus</i> genus | <i>Webervirus</i> genus |

6

**Supplementary Table 3****Annotation of the sequence of phage P24 (also called 066024, accession no. MW042792.1).**

| contig_id | feature_id          | start | stop  | strand | rbs_motif   | rbs_spacer | function                                                  |
|-----------|---------------------|-------|-------|--------|-------------|------------|-----------------------------------------------------------|
| 066024    | fig 066024.3.peg.1  | 16    | 969   | +      | AGGAG       | 5-10bp     | Phage capsid and scaffold                                 |
| 066024    | fig 066024.3.peg.2  | 1111  | 2142  | +      | AGGAG       | 5-10bp     | Phage capsid and scaffold                                 |
| 066024    | fig 066024.3.peg.3  | 2199  | 2420  | +      | GGAG/GAGG   | 5-10bp     | hypothetical protein                                      |
| 066024    | fig 066024.3.peg.4  | 2485  | 3063  | +      | AGGAG       | 5-10bp     | Phage tail fiber protein / T7-like tail tubular protein A |
| 066024    | fig 066024.3.peg.5  | 3086  | 5461  | +      | AGGAG       | 5-10bp     | Phage tail fiber protein / T7-like tail tubular protein B |
| 066024    | fig 066024.3.peg.6  | 5534  | 5944  | +      | GGA/GAG/AGG | 5-10bp     | Phage internal (core) protein                             |
| 066024    | fig 066024.3.peg.7  | 5947  | 6537  | +      | AGGAG       | 5-10bp     | Phage internal (core) protein                             |
| 066024    | fig 066024.3.peg.8  | 6537  | 8792  | +      | AGGAGG      | 5-10bp     | Phage internal (core) protein                             |
| 066024    | fig 066024.3.peg.9  | 8809  | 9216  | +      | AGGAG       | 5-10bp     | hypothetical protein                                      |
| 066024    | fig 066024.3.peg.10 | 9200  | 13168 | +      | GGAGG       | 3-4bp      | Phage internal (core) protein                             |
| 066024    | fig 066024.3.peg.11 | 13230 | 16283 | +      | AGGAGG      | 5-10bp     | Phage tail fibers*                                        |
| 066024    | fig 066024.3.peg.12 | 16294 | 16503 | +      | AGGAGG      | 5-10bp     | Phage holin, class II                                     |
| 066024    | fig 066024.3.peg.13 | 16537 | 16794 | +      | AGGAG       | 5-10bp     | DNA packaging protein A, T7-like gp18                     |
| 066024    | fig 066024.3.peg.14 | 16891 | 17337 | +      | GGAGG       | 3-4bp      | Phage endopeptidase (EC 3.4.-.-) Rz                       |
| 066024    | fig 066024.3.peg.15 | 17334 | 19091 | +      | GGAGG       | 5-10bp     | Phage DNA packaging                                       |
| 066024    | fig 066024.3.peg.16 | 19336 | 19485 | +      | AGGAGG      | 3-4bp      | hypothetical protein                                      |
| 066024    | fig 066024.3.peg.17 | 20650 | 20829 | +      | GGAG/GAGG   | 5-10bp     | hypothetical protein                                      |
| 066024    | fig 066024.3.peg.18 | 20896 | 21348 | +      | AGGA        | 5-10bp     | S-adenosyl-L-methionine hydrolase, phage-associated       |
| 066024    | fig 066024.3.peg.19 | 21348 | 21494 | +      | GGAGG       | 5-10bp     | hypothetical protein                                      |
| 066024    | fig 066024.3.peg.20 | 21472 | 21669 | +      | GGA/GAG/AGG | 5-10bp     | hypothetical protein                                      |
| 066024    | fig 066024.3.peg.21 | 21653 | 21832 | +      | GGA/GAG/AGG | 5-10bp     | hypothetical protein                                      |
| 066024    | fig 066024.3.peg.22 | 21868 | 22884 | +      | AGGA        | 5-10bp     | Phage protein kinase (EC 2.7.11.1)                        |
| 066024    | fig 066024.3.peg.23 | 22954 | 25674 | +      | GGAG/GAGG   | 5-10bp     | DNA-directed RNA polymerase (EC 2.7.7.6)                  |
| 066024    | fig 066024.3.peg.24 | 25773 | 26333 | +      | GGAG/GAGG   | 5-10bp     | hypothetical protein                                      |
| 066024    | fig 066024.3.peg.25 | 26423 | 26599 | +      | AGGA        | 5-10bp     | hypothetical protein                                      |
| 066024    | fig 066024.3.peg.26 | 26603 | 26860 | +      | AGGA        | 5-10bp     | hypothetical protein                                      |
| 066024    | fig 066024.3.peg.27 | 26961 | 28010 | +      | GGAG/GAGG   | 5-10bp     | DNA ligase, phage-associated                              |
| 066024    | fig 066024.3.peg.28 | 28210 | 28473 | +      | AGGAG       | 5-10bp     | hypothetical protein                                      |
| 066024    | fig 066024.3.peg.29 | 28466 | 28912 | +      | AGGAGG      | 5-10bp     | hypothetical protein                                      |
| 066024    | fig 066024.3.peg.30 | 28899 | 29024 | +      | GGA/GAG/AGG | 5-10bp     | hypothetical protein                                      |

|        |                     |       |       |   |            |         |                                                               |
|--------|---------------------|-------|-------|---|------------|---------|---------------------------------------------------------------|
| 066024 | fig 066024.3.peg.31 | 28990 | 29154 | + | AGGAG      | 5-10bp  | Host RNA polymerase inhibitor, T7-like gp2                    |
| 066024 | fig 066024.3.peg.32 | 29220 | 29402 | + | AGGAGG     | 5-10bp  | hypothetical protein                                          |
| 066024 | fig 066024.3.peg.33 | 29415 | 30113 | + | AGGAG      | 5-10bp  | T7-like phage ssDNA-binding protein                           |
| 066024 | fig 066024.3.peg.34 | 30113 | 30562 | + | 3Base/5BMM | 13-15bp | T7-like phage endonuclease (EC 3.1.21.2)                      |
| 066024 | fig 066024.3.peg.35 | 30565 | 31020 | + | AGGAG      | 5-10bp  | Phage lysin, N-acetylmuramoyl-L-alanine amidase (EC 3.5.1.28) |
| 066024 | fig 066024.3.peg.36 | 31197 | 31316 | + | GGAG/GAGG  | 5-10bp  | hypothetical protein                                          |
| 066024 | fig 066024.3.peg.37 | 31517 | 33043 | + | AGGAGG     | 5-10bp  | T7-like phage primase/helicase protein                        |
| 066024 | fig 066024.3.peg.38 | 33137 | 33346 | + | AGGAG      | 5-10bp  | hypothetical protein                                          |
| 066024 | fig 066024.3.peg.39 | 33346 | 33657 | + | AGGAG      | 5-10bp  | Tail tubular A-like protein                                   |
| 066024 | fig 066024.3.peg.40 | 33731 | 34108 | + | GGAG/GAGG  | 5-10bp  | hypothetical protein                                          |
| 066024 | fig 066024.3.peg.41 | 34134 | 36257 | + | AGGAG      | 5-10bp  | T7-like phage DNA Polymerase (EC 2.7.7.7)                     |
| 066024 | fig 066024.3.peg.42 | 36276 | 36563 | + | AGGAG      | 5-10bp  | Phage HNS binding protein                                     |
| 066024 | fig 066024.3.peg.43 | 36560 | 36769 | + | GGAG/GAGG  | 5-10bp  | Phage HNS binding protein                                     |
| 066024 | fig 066024.3.peg.44 | 36766 | 37149 | + | GGAGG      | 5-10bp  | hypothetical protein                                          |
| 066024 | fig 066024.3.peg.45 | 37142 | 38047 | + | GGAGG      | 5-10bp  | T7-like phage exonuclease (EC 3.1.11.3)                       |
| 066024 | fig 066024.3.peg.46 | 38029 | 38139 | + | GGAG/GAGG  | 5-10bp  | hypothetical protein                                          |
| 066024 | fig 066024.3.peg.47 | 38225 | 38470 | + | AGGAG      | 5-10bp  | DUF2717 domain-containing protein                             |
| 066024 | fig 066024.3.peg.48 | 38473 | 38694 | + | AGGAG      | 5-10bp  | DUF5476 domain-containing protein                             |
| 066024 | fig 066024.3.peg.49 | 38696 | 38956 | + | AGGAGG     | 5-10bp  | Tail assembly protein                                         |
| 066024 | fig 066024.3.peg.50 | 38980 | 40686 | + | GGAG/GAGG  | 5-10bp  | Phage collar / T7-like phage head-to-tail joining protein     |

Genome sequences were annotated using Prokka v1.12 and Rapid Annotations Subsystems Technology (RAST, <http://rast.nmpdr.org/>), and were manually curated using BLASTp.

\*fig|066024.3.peg.11 encodes phage tail fibers, which is also a depolymerase.

**Supplementary Table 4**  
**Genome characterization of *Przondovirus* genus phages**

| <i>Przondovirus</i> genus phage | Accession no. | Size (Kb) | GC%  | Protein | tRNAs |
|---------------------------------|---------------|-----------|------|---------|-------|
| Klebsiella phage KP32           | GQ413937.1    | 41.1      | 52.4 | 44      | 0     |
| Klebsiella phage vB_KpnP_KpV767 | NC_047772.1   | 40.4      | 52.3 | 52      | 0     |
| Klebsiella phage vB_KpnP_PRA33  | NC_047780.1   | 40.61     | 52.5 | 52      | 0     |
| Klebsiella virus KP32i192       | NC_047968.1   | 40.64     | 52.9 | 41      | 0     |
| Klebsiella phage Henu1          | NC_048138.1   | 40.35     | 53.1 | 42      | 0     |
| Klebsiella phage vB_KpnP_KpV766 | NC_047773.1   | 41.28     | 52.6 | 50      | 0     |
| Klebsiella phage vB_KpnP_IME321 | NC_048014.1   | 39.91     | 52.8 | 49      | 0     |
| Klebsiella phage vB_KpnP_KpV289 | NC_028977.1   | 41.05     | 52.6 | 51      | 0     |
| Klebsiella virus KP32i194       | NC_047969.1   | 41.16     | 52.9 | 41      | 0     |
| Klebsiella virus KP32i196       | NC_047971.1   | 40.34     | 52.9 | 41      | 0     |
| Klebsiella phage 2044-307w      | NC_047842.1   | 40.05     | 52.9 | 44      | 0     |
| Klebsiella phage K5-4           | NC_047799.1   | 40.16     | 53.1 | 42      | 0     |
| Klebsiella phage vB_Kp1         | KT367885.1    | 40.11     | 53.3 | 47      | 0     |
| Klebsiella phage K11            | EU734173.1    | 41.18     | 53.2 | 51      | 0     |
| Klebsiella phage vB_KpnP_BIS33  | NC_047781.1   | 41.7      | 52.7 | 56      | 0     |
| Klebsiella phage Pharr          | NC_048175.1   | 40.6      | 53.3 | 47      | 0     |
| Klebsiella phage vB_KpnP_KpV763 | NC_047771.1   | 40.77     | 53.2 | 49      | 0     |
| Klebsiella phage K5             | KR149291.1    | 41.7      | 52.5 | 46      | 0     |
| Escherichia phage K30           | HM480846.1    | 40.94     | 51.4 | 49      | 0     |
| Klebsiella phage K5-2           | NC_047798.1   | 41.12     | 53.3 | 42      | 0     |
| Klebsiella phage KN3-1          | NC_048131.1   | 41.06     | 53.5 | 24      | 0     |
| Klebsiella phage vB_KpnP_IL33   | NC_047782.1   | 41.33     | 52.5 | 54      | 0     |
| Klebsiella virus KP32i195       | NC_047970.1   | 40.54     | 52.9 | 41      | 0     |
| <b>Klebsiella phage 066024</b>  | MW042792.1    | 40.77     | 53.2 | 50      | 0     |
| Klebsiella phage KN1-1          | NC_048129.1   | 40.24     | 52.8 | 22      | 0     |
| Klebsiella phage kpssk3         | NC_048114.1   | 40.54     | 52.8 | 42      | 0     |
| Klebsiella phage KN4-1          | NC_048130.1   | 41.22     | 52.9 | 20      | 0     |
| Klebsiella phage SH-Kp 152410   | NC_047908.1   | 40.95     | 52.3 | 47      | 0     |
| Klebsiella phage vB_KpnP_IME205 | NC_047761.1   | 41.31     | 52.2 | 49      | 0     |



**Supplementary Table 5**

**Genome Comparison between *Przondovirus* genus phages and phage P24 (066024) using blastn**

| Description                                        | Name                            | Coverage, % | Identity, % | Overall DNA sequence homolog (coverage × identity, %) | Accession   |
|----------------------------------------------------|---------------------------------|-------------|-------------|-------------------------------------------------------|-------------|
| <b>Klebsiella phage 066024, complete genome</b>    | Klebsiella phage 066024         | 100         | 100         | 100                                                   | MW042792.1  |
| Klebsiella phage vB_Kp1, complete genome           | Klebsiella phage vB_Kp1         | 96          | 95.73       | 91.9                                                  | KT367885.1  |
| Klebsiella virus KP32 isolate 195, complete genome | Klebsiella virus KP32           | 94          | 93.54       | 87.93                                                 | NC_047970.1 |
| Klebsiella phage kpssk3, complete genome           | Klebsiella phage kpssk3         | 93          | 93.62       | 87.07                                                 | NC_048114.1 |
| Klebsiella phage SH-Kp 152410, complete genome     | Klebsiella phage SH-Kp 152410   | 88          | 94.48       | 83.14                                                 | NC_047908.1 |
| Klebsiella phage K11, complete genome              | Klebsiella phage K11            | 88          | 93.29       | 82.1                                                  | EU734173.1  |
| Klebsiella phage K5-4, complete genome             | Klebsiella phage K5-4           | 88          | 92.63       | 81.51                                                 | NC_047799.1 |
| Klebsiella phage Henu1, complete genome            | Klebsiella phage Henu1          | 87          | 93.41       | 81.27                                                 | NC_048138.1 |
| Klebsiella virus KP32 isolate 192, complete genome | Klebsiella virus KP32           | 87          | 92.88       | 80.81                                                 | NC_047968.1 |
| Klebsiella phage KN4-1 DNA, complete genome        | Klebsiella phage KN4-1          | 88          | 91.7        | 80.7                                                  | NC_048130.1 |
| Klebsiella phage vB_KpnP_KpV767, complete genome   | Klebsiella phage vB_KpnP_KpV767 | 87          | 92.19       | 80.21                                                 | NC_047772.1 |
| Klebsiella phage 2044-307w, complete genome        | Klebsiella phage 2044-307w      | 87          | 91.84       | 79.9                                                  | NC_047842.1 |
| Klebsiella phage vB_KpnP_KpV763, complete genome   | Klebsiella phage vB_KpnP_KpV763 | 87          | 91.79       | 79.86                                                 | NC_047771.1 |
| Klebsiella phage K5-2, complete genome             | Klebsiella phage K5-2           | 87          | 91.21       | 79.35                                                 | NC_047798.1 |
| Klebsiella phage vB_KpnP_IME321, complete genome   | Klebsiella phage vB_KpnP_IME321 | 87          | 91.14       | 79.29                                                 | NC_048014.1 |
| Klebsiella phage KP32, complete genome             | Klebsiella phage KP32           | 86          | 92.1        | 79.21                                                 | GQ413937.1  |
| Klebsiella virus KP32 isolate 194, complete genome | Klebsiella virus KP32           | 86          | 92.06       | 79.17                                                 | NC_047969.1 |
| Klebsiella phage vB_KpnP_PRA33, complete genome    | Klebsiella phage vB_KpnP_PRA33  | 87          | 90.80       | 79                                                    | NC_047780.1 |
| Enterobacteria phage K30, complete genome          | Escherichia phage K30           | 86          | 91.62       | 78.79                                                 | HM480846.1  |
| Klebsiella phage KN3-1 DNA, complete genome        | Klebsiella phage KN3-1          | 86          | 91.13       | 78.37                                                 | NC_048131.1 |
| Klebsiella phage vB_KpnP_IME205, complete genome   | Klebsiella phage vB_KpnP_IME205 | 84          | 93.21       | 78.3                                                  | NC_047761.1 |
| Klebsiella phage vB_KpnP_BIS33, complete genome    | Klebsiella phage vB_KpnP_BIS33  | 86          | 91.03       | 78.29                                                 | NC_047781.1 |
| Klebsiella phage Pharr, complete genome            | Klebsiella phage Pharr          | 86          | 90.68       | 77.98                                                 | NC_048175.1 |
| Klebsiella phage vB_KpnP_KpV289, complete genome   | Klebsiella phage vB_KpnP_KpV289 | 87          | 89.43       | 77.8                                                  | NC_028977.1 |
| Klebsiella phage K5, complete genome               | Klebsiella phage K5             | 86          | 89.87       | 77.29                                                 | KR149291.1  |
| Klebsiella virus KP32 isolate 196, complete genome | Klebsiella virus KP32           | 84          | 91.56       | 76.91                                                 | NC_047971.1 |
| Klebsiella phage KN1-1 DNA, complete genome        | Klebsiella phage KN1-1          | 85          | 89.93       | 76.44                                                 | NC_048129.1 |
| Klebsiella phage vB_KpnP_KpV766, complete genome   | Klebsiella phage vB_KpnP_KpV766 | 85          | 89.6        | 76.16                                                 | NC_047773.1 |
| Klebsiella phage vB_KpnP_IL33, complete genome     | Klebsiella phage vB_KpnP_IL33   | 85          | 87.05       | 73.99                                                 | NC_047782.1 |

## Supplementary Table 6

## Annotation of the sequence of phage P39 (accession no. MW042802.1).

| contig id | feature id          | start | stop  | strand | rbs motif   | rbs spacer | function                                               |
|-----------|---------------------|-------|-------|--------|-------------|------------|--------------------------------------------------------|
| 066039    | fig 066039.3.peg.1  | 636   | 34    | -      | AGGA        | 5-10bp     | Phage tail assembly protein                            |
| 066039    | fig 066039.3.peg.2  | 1348  | 611   | -      | GGA/GAG/AGG | 5-10bp     | Phage tail assembly protein                            |
| 066039    | fig 066039.3.peg.3  | 2102  | 1350  | -      | AGGAG       | 5-10bp     | Phage minor tail protein                               |
| 066039    | fig 066039.3.peg.4  | 2516  | 2172  | -      | GGAG/GAGG   | 5-10bp     | Phage minor tail protein #tail protein M               |
| 066039    | fig 066039.3.peg.5  | 5485  | 2519  | -      | GGxGG       | 5-10bp     | Phage tail length tape-measure protein                 |
| 066039    | fig 066039.3.peg.6  | 6161  | 5835  | -      | AGGAG       | 5-10bp     | Tail assembly chaperone                                |
| 066039    | fig 066039.3.peg.7  | 6895  | 6248  | -      | AGGAG       | 5-10bp     | Phage tail protein, putative tail protein depolymerase |
| 066039    | fig 066039.3.peg.8  | 7642  | 6947  | -      | GGAGG       | 5-10bp     | Phage tail protein, putative tail depolymerase         |
| 066039    | fig 066039.3.peg.9  | 8060  | 7629  | -      | GGAG/GAGG   | 5-10bp     | DUF4128 domain-containing protein                      |
| 066039    | fig 066039.3.peg.10 | 8487  | 8050  | -      | GGA/GAG/AGG | 5-10bp     | Putative neck protein                                  |
| 066039    | fig 066039.3.peg.11 | 8857  | 8480  | -      | GGAGG       | 5-10bp     | Head-to-tail connector protein                         |
| 066039    | fig 066039.3.peg.12 | 9279  | 8863  | -      | GGAG/GAGG   | 5-10bp     | DUF4054 domain-containing protein                      |
| 066039    | fig 066039.3.peg.13 | 9639  | 9331  | -      | AGGAG       | 5-10bp     | hypothetical protein                                   |
| 066039    | fig 066039.3.peg.14 | 10672 | 9731  | -      | AGGAG       | 5-10bp     | Major capsid protein                                   |
| 066039    | fig 066039.3.peg.15 | 11295 | 10783 | -      | AGGAG       | 5-10bp     | Capsid decoration protein                              |
| 066039    | fig 066039.3.peg.16 | 12477 | 11347 | -      | GGAG/GAGG   | 5-10bp     | Major capsid protein                                   |
| 066039    | fig 066039.3.peg.17 | 13244 | 12474 | -      | AGGAG       | 5-10bp     | Head morphogenesis protein                             |
| 066039    | fig 066039.3.peg.18 | 14553 | 13234 | -      | GGA/GAG/AGG | 5-10bp     | Phage portal protein                                   |
| 066039    | fig 066039.3.peg.19 | 16204 | 14600 | -      | GGA/GAG/AGG | 5-10bp     | Phage terminase, large subunit                         |
| 066039    | fig 066039.3.peg.20 | 16738 | 16214 | -      | AGGAG       | 5-10bp     | Phage terminase, small subunit                         |
| 066039    | fig 066039.3.peg.21 | 17079 | 16816 | -      | GGA/GAG/AGG | 5-10bp     | hypothetical protein                                   |
| 066039    | fig 066039.3.peg.22 | 17264 | 17073 | -      | GGA/GAG/AGG | 5-10bp     | hypothetical protein                                   |
| 066039    | fig 066039.3.peg.23 | 17582 | 17403 | -      | GGAG/GAGG   | 5-10bp     | hypothetical protein                                   |
| 066039    | fig 066039.3.peg.24 | 17815 | 17582 | -      | GGAG/GAGG   | 5-10bp     | hypothetical protein                                   |
| 066039    | fig 066039.3.peg.25 | 18040 | 17816 | -      | GGA/GAG/AGG | 5-10bp     | hypothetical protein                                   |
| 066039    | fig 066039.3.peg.26 | 18685 | 18110 | -      | GGA/GAG/AGG | 5-10bp     | Phage EaA protein                                      |
| 066039    | fig 066039.3.peg.27 | 18954 | 18682 | -      | AGGAG       | 5-10bp     | hypothetical protein                                   |
| 066039    | fig 066039.3.peg.28 | 19681 | 19031 | -      | GGAG/GAGG   | 5-10bp     | hypothetical protein                                   |
| 066039    | fig 066039.3.peg.29 | 20187 | 19753 | -      | AGGAG       | 5-10bp     | hypothetical protein                                   |
| 066039    | fig 066039.3.peg.30 | 20396 | 20187 | -      | AGGAG       | 5-10bp     | hypothetical protein                                   |
| 066039    | fig 066039.3.peg.31 | 20656 | 20477 | -      | GGAG/GAGG   | 5-10bp     | hypothetical protein                                   |
| 066039    | fig 066039.3.peg.32 | 20898 | 20653 | -      | GGA/GAG/AGG | 5-10bp     | hypothetical protein                                   |
| 066039    | fig 066039.3.peg.33 | 21278 | 20910 | -      | GGAG/GAGG   | 5-10bp     | hypothetical protein                                   |
| 066039    | fig 066039.3.peg.34 | 21664 | 21347 | -      | GGA/GAG/AGG | 5-10bp     | hypothetical protein                                   |
| 066039    | fig 066039.3.peg.35 | 21876 | 21664 | -      | GGAG/GAGG   | 5-10bp     | hypothetical protein                                   |
| 066039    | fig 066039.3.peg.36 | 22156 | 21947 | -      | GGAG/GAGG   | 5-10bp     | hypothetical protein                                   |
| 066039    | fig 066039.3.peg.37 | 22343 | 22146 | -      | GGAG/GAGG   | 5-10bp     | hypothetical protein                                   |
| 066039    | fig 066039.3.peg.38 | 22558 | 22340 | -      | GGA/GAG/AGG | 11-12bp    | hypothetical protein                                   |
| 066039    | fig 066039.3.peg.39 | 22809 | 22555 | -      | GGA/GAG/AGG | 5-10bp     | hypothetical protein                                   |
| 066039    | fig 066039.3.peg.40 | 23034 | 22822 | -      | AGGAG       | 5-10bp     | hypothetical protein                                   |
| 066039    | fig 066039.3.peg.41 | 23317 | 23102 | -      | AGGAG       | 5-10bp     | hypothetical protein                                   |
| 066039    | fig 066039.3.peg.42 | 23541 | 23320 | -      | GGA/GAG/AGG | 5-10bp     | hypothetical protein                                   |
| 066039    | fig 066039.3.peg.43 | 23774 | 23538 | -      | GGA/GAG/AGG | 5-10bp     | hypothetical protein                                   |
| 066039    | fig 066039.3.peg.44 | 24150 | 23845 | -      | GGA/GAG/AGG | 5-10bp     | hypothetical protein                                   |
| 066039    | fig 066039.3.peg.45 | 24677 | 24147 | -      | GGA/GAG/AGG | 5-10bp     | hypothetical protein                                   |
| 066039    | fig 066039.3.peg.46 | 25332 | 25607 | +      | AGGAG       | 5-10bp     | hypothetical protein                                   |
| 066039    | fig 066039.3.peg.47 | 25610 | 25891 | +      | GGAG/GAGG   | 5-10bp     | hypothetical protein                                   |

|        |                     |       |       |   |                |         |                                            |
|--------|---------------------|-------|-------|---|----------------|---------|--------------------------------------------|
| 066039 | fig 066039.3.peg.48 | 25872 | 26201 | + | AGGAG          | 5-10bp  | hypothetical protein                       |
| 066039 | fig 066039.3.peg.49 | 26228 | 26566 | + | GGAG/GAGG      | 5-10bp  | hypothetical protein                       |
| 066039 | fig 066039.3.peg.50 | 26639 | 26833 | + | AGGAG          | 5-10bp  | hypothetical protein                       |
| 066039 | fig 066039.3.peg.51 | 27070 | 27447 | + | AGGA/GGAG/GAGG | 11-12bp | hypothetical protein                       |
| 066039 | fig 066039.3.peg.52 | 27520 | 27747 | + | AGGAG          | 5-10bp  | hypothetical protein                       |
| 066039 | fig 066039.3.peg.53 | 27747 | 28088 | + | GGAG/GAGG      | 5-10bp  | hypothetical protein                       |
| 066039 | fig 066039.3.peg.54 | 28081 | 28320 | + | GGAGG          | 5-10bp  | Putative cytosine DNA methylase            |
| 066039 | fig 066039.3.peg.55 | 28328 | 29020 | + | GGAG/GAGG      | 5-10bp  | DNA cytosine methyltransferase             |
| 066039 | fig 066039.3.peg.56 | 29093 | 29302 | + | GGAG/GAGG      | 5-10bp  | hypothetical protein                       |
| 066039 | fig 066039.3.peg.57 | 29292 | 29474 | + | GGxGG          | 5-10bp  | hypothetical protein                       |
| 066039 | fig 066039.3.peg.58 | 29476 | 29913 | + | AGGA           | 5-10bp  | hypothetical protein                       |
| 066039 | fig 066039.3.peg.59 | 30038 | 31606 | + | AGGAG          | 5-10bp  | Putative helicase                          |
| 066039 | fig 066039.3.peg.60 | 31610 | 32071 | + | GGAG/GAGG      | 5-10bp  | hypothetical protein                       |
| 066039 | fig 066039.3.peg.61 | 32565 | 32140 | - | AGGA           | 5-10bp  | Putative spanin                            |
| 066039 | fig 066039.3.peg.62 | 33044 | 32562 | - | AGGAG          | 5-10bp  | Phage lysin/Phage lysozyme                 |
| 066039 | fig 066039.3.peg.63 | 33261 | 33046 | - | GGAG/GAGG      | 5-10bp  | Phage holin                                |
| 066039 | fig 066039.3.peg.64 | 33968 | 33396 | - | GGAG/GAGG      | 5-10bp  | Putative nucleoside triphosphate hydrolase |
| 066039 | fig 066039.3.peg.65 | 34459 | 33965 | - | AGGA           | 5-10bp  | 3'-phosphatase, 5'-polynucleotide kinase   |
| 066039 | fig 066039.3.peg.66 | 35627 | 34497 | - | GGA/GAG/AGG    | 5-10bp  | hypothetical protein                       |
| 066039 | fig 066039.3.peg.67 | 35971 | 35723 | - | AGGAG          | 5-10bp  | hypothetical protein                       |
| 066039 | fig 066039.3.peg.68 | 36207 | 35971 | - | AGGAG          | 5-10bp  | hypothetical protein                       |
| 066039 | fig 066039.3.peg.69 | 36508 | 36272 | - | GGA/GAG/AGG    | 5-10bp  | hypothetical protein                       |
| 066039 | fig 066039.3.peg.70 | 37243 | 36512 | - | AGGA           | 5-10bp  | DNA adenine methyltransferase              |
| 066039 | fig 066039.3.peg.71 | 37472 | 37245 | - | GGAG/GAGG      | 5-10bp  | PDDEXK-like family protein                 |
| 066039 | fig 066039.3.peg.72 | 37952 | 37545 | - | GGAGG          | 5-10bp  | VRR-NUC domain-containing protein          |
| 066039 | fig 066039.3.peg.73 | 39985 | 37949 | - | AGGA           | 5-10bp  | DNA helicase, phage-associated             |
| 066039 | fig 066039.3.peg.74 | 40076 | 40477 | + | GGAG/GAGG      | 5-10bp  | Transcriptional regulator                  |
| 066039 | fig 066039.3.peg.75 | 40553 | 41515 | + | GGAGG          | 5-10bp  | DNA primase/helicase                       |
| 066039 | fig 066039.3.peg.76 | 42012 | 43058 | + | AGGAG          | 5-10bp  | Phage exonuclease                          |
| 066039 | fig 066039.3.peg.77 | 43118 | 43774 | + | AGGA           | 5-10bp  | Phage-associated recombinase               |
| 066039 | fig 066039.3.peg.78 | 43811 | 44275 | + | AGGA           | 5-10bp  | Putative ssDNA binding protein             |
| 066039 | fig 066039.3.peg.79 | 44368 | 47046 | + | GGAG/GAGG      | 5-10bp  | Phage tail fibers                          |
| 066039 | fig 066039.3.peg.80 | 48030 | 47074 | - | GGAGG          | 5-10bp  | DUF6453 family protein                     |
| 066039 | fig 066039.3.peg.81 | 48490 | 48032 | - | 3Base/5BMM     | 13-15bp | Phage tail fiber protein*                  |
| 066039 | fig 066039.3.peg.82 | 48568 | 51579 | - | AGGAG          | 5-10bp  | Phage tail fiber protein                   |

Genome sequences were annotated using Prokka v1.12, RAST, and were manually curated using BLASTp. Ribosome binding sites (RBS) of genes were identified using Prodigal v2.6.3 (<https://github.com/hyattpd/Prodigal>).

\*fig|066039.3.peg.81 encodes phage tail fiber protein, which is predicted to be a depolymerase.

**Supplementary Table 7**  
**Genome characterization of *Webervirus* genus phages**

| <i>Webervirus</i> genus phage   | Accession no. | Size (Kb) | GC% | Protein | tRNAs |
|---------------------------------|---------------|-----------|-----|---------|-------|
| Klebsiella phage KP36           | JF501022.1    | 49.8      | 51  | 79      | 0     |
| Klebsiella virus GML-KpCol1     | NC_047907.1   | 50.25     | 51  | 78      | 0     |
| Klebsiella phage KPN N141       | NC_047841.1   | 49.09     | 51  | 76      | 0     |
| Klebsiella phage NJS2           | NC_048043.1   | 50.13     | 51  | 79      | 0     |
| Klebsiella phage KpKT21phi1     | NC_048143.1   | 49.11     | 51  | 76      | 0     |
| Klebsiella phage NJR15          | NC_048044.1   | 49.47     | 51  | 75      | 0     |
| Klebsiella phage GH-K3          | NC_048162.1   | 49.43     | 50  | 77      | 0     |
| Klebsiella phage TAH8           | NC_048042.1   | 49.34     | 51  | 76      | 0     |
| Klebsiella phage TSK1           | NC_048126.1   | 49.86     | 51  | 74      | 0     |
| Klebsiella phage 1513           | KP658157.1    | 49.46     | 51  | 72      | 0     |
| Klebsiella phage Sushi          | NC_028774.1   | 48.75     | 51  | 76      | 0     |
| Klebsiella phage MezzoGao       | NC_047850.1   | 49.81     | 51  | 76      | 0     |
| Klebsiella phage NJS1           | NC_048024.1   | 49.29     | 51  | 71      | 0     |
| Klebsiella phage KLPN1          | KR262148.1    | 49.04     | 51  | 72      | 0     |
| Klebsiella phage PKP126         | KR269719.1    | 50.93     | 51  | 78      | 0     |
| Klebsiella phage vB_KpnS_KpV522 | NC_047784.1   | 51.1      | 51  | 79      | 0     |
| Klebsiella phage KOX1           | NC_047825.1   | 50.53     | 51  | 81      | 0     |
| <b>Klebsiella phage 066039</b>  | MW042802.1    | 51.63     | 52  | 81      | 0     |
| Enterobacter virus F20          | NC_043469.1   | 51.54     | 48  | 83      | 0     |

**Supplementary Table 8**

**Genome Comparison between *Webervirus* genus phages and phage P39 (066039) using blastn**

| Description                                      | Name                            | Coverage, % | Identity, % | Overall DNA sequence homolog (coverage x identity, %) | Accession   |
|--------------------------------------------------|---------------------------------|-------------|-------------|-------------------------------------------------------|-------------|
| <b>Klebsiella phage 066039, complete genome</b>  | Klebsiella phage 066039         | 100         | 100         | 100                                                   | MW042802.1  |
| Klebsiella phage vB_KpnS_KpV522, complete genome | Klebsiella phage vB_KpnS_KpV522 | 87          | 97.1        | 84.477                                                | NC_047784.1 |
| Klebsiella phage KOX1, complete genome           | Klebsiella phage KOX1           | 87          | 96.62       | 84.0594                                               | NC_047825.1 |
| Klebsiella phage PKP126, complete genome         | Klebsiella phage PKP126         | 85          | 95.26       | 80.971                                                | KR269719.1  |
| Klebsiella phage KLPN1, complete genome          | Klebsiella phage KLPN1          | 82          | 92.61       | 75.9402                                               | KR262148.1  |
| Enterobacteria phage F20, partial genome         | Enterobacter virus F20          | 88          | 83.9        | 73.832                                                | NC_043469.1 |
| Klebsiella phage NJR15, complete genome          | Klebsiella phage NJR15          | 88          | 83.87       | 73.8056                                               | NC_048044.1 |
| Klebsiella phage TAH8, complete genome           | Klebsiella phage TAH8           | 88          | 83.74       | 73.6912                                               | NC_048042.1 |
| Klebsiella phage NJS2, complete genome           | Klebsiella phage NJS2           | 86          | 84.27       | 72.4722                                               | NC_048043.1 |
| Klebsiella phage KPN N141, complete genome       | Klebsiella phage KPN N141       | 85          | 83.82       | 71.247                                                | NC_047841.1 |
| Klebsiella phage NJS1, complete genome           | Klebsiella phage NJS1           | 85          | 83.73       | 71.1705                                               | NC_048024.1 |
| Klebsiella phage MezzoGao, complete genome       | Klebsiella phage MezzoGao       | 84          | 83.92       | 70.4928                                               | NC_047850.1 |
| Klebsiella phage KP36, complete genome           | Klebsiella phage KP36           | 83          | 83.68       | 69.4544                                               | JF501022.1  |
| Klebsiella phage KpKT21phi1, complete genome     | Klebsiella phage KpKT21phi1     | 83          | 83.6        | 69.388                                                | NC_048143.1 |
| Klebsiella phage Sushi, complete genome          | Klebsiella phage Sushi          | 82          | 83.91       | 68.8062                                               | NC_028774.1 |
| Klebsiella virus GML-KpCol1, complete genome     | Klebsiella virus GML-KpCol1     | 82          | 83.87       | 68.7734                                               | NC_047907.1 |
| Klebsiella phage GH-K3, complete genome          | Klebsiella phage GH-K3          | 80          | 84.08       | 67.264                                                | NC_048162.1 |
| Klebsiella phage 1513, complete genome           | Klebsiella phage 1513           | 80          | 83.95       | 67.16                                                 | KP658157.1  |
| Klebsiella phage TSK1, complete genome           | Klebsiella phage TSK1           | 79          | 83.69       | 66.1151                                               | NC_048126.1 |

**Supplementary Table 9**
**SNPs between the genome sequence of B2-1 and its P39 resistant mutants using snippy**

|      | contig no. | Position | Type    | Reference | Alteration | Region             | Strand | Effect                                | Locus_tag      | Gene        | Product                                       |
|------|------------|----------|---------|-----------|------------|--------------------|--------|---------------------------------------|----------------|-------------|-----------------------------------------------|
| B2-1 | 00014      | 84867    | snp     | G         | A          | non-coding regions |        |                                       |                |             |                                               |
|      | 00032      | 45406    | snp     | A         | G          | CDS                | +      | missense_variant c.346A>G p.Ile116Val | HIOACJJI_04689 | <i>traS</i> | Protein TraS                                  |
|      | 00043      | 11102    | snp     | C         | T          | CDS                | +      | stop_gained c.532C>T p.Gln178*        | HIOACJJI_05113 | <i>epsJ</i> | hypothetical protein                          |
|      | 00048      | 96       | snp     | G         | T          | CDS                | +      | missense_variant c.63G>T p.Gln21His   | HIOACJJI_05221 |             | hypothetical protein                          |
|      | 00048      | 626      | snp     | T         | C          | CDS                | +      | missense_variant c.593T>C p.Leu198Pro | HIOACJJI_05221 |             | hypothetical protein                          |
|      | 00048      | 1974     | snp     | A         | G          | CDS                | +      | synonymous_variant c.51A>G p.Pro17Pro | HIOACJJI_05224 |             | hypothetical protein                          |
|      | 00055      | 3043     | complex | AAGA      | GAAC       | non-coding regions |        |                                       |                |             |                                               |
|      | 00098      | 96       | snp     | A         | T          | non-coding regions |        |                                       |                |             |                                               |
| B2-2 | 00012      | 51170    | snp     | C         | A          | CDS                | -      | missense_variant c.208G>T p.Asp70Tyr  | HOMDKAIB_02591 | <i>pdeC</i> | putative cyclic di-GMP phosphodiesterase PdeC |
|      | 00014      | 56644    | snp     | C         | T          | CDS                | -      | missense_variant c.181G>A p.Ala61Thr  | HOMDKAIB_02836 | <i>hfq</i>  | RNA-binding protein Hfq                       |
|      | 00029      | 60067    | snp     | C         | T          | CDS                | -      | missense_variant c.713G>A p.Arg238Gln | HOMDKAIB_04201 |             | IS5 family transposase IS903                  |
|      | 00061      | 7957     | snp     | A         | G          | non-coding regions |        |                                       |                |             |                                               |
|      | 00061      | 8005     | snp     | A         | G          | non-coding regions |        |                                       |                |             |                                               |
|      | 00062      | 10729    | snp     | T         | C          | non-coding regions |        |                                       |                |             |                                               |
|      | 00068      | 2833     | snp     | T         | G          | CDS                | -      | missense_variant c.46A>C p.Ser16Arg   | HOMDKAIB_05479 |             | hypothetical protein                          |
|      | 00143      | 51       | snp     | C         | T          | non-coding regions |        |                                       |                |             |                                               |
| B2-3 | 00014      | 84867    | snp     | G         | A          | non-coding regions |        |                                       |                |             |                                               |
|      | 00055      | 3043     | complex | AAGA      | GAAC       | non-coding regions |        |                                       |                |             |                                               |

**Supplementary Table 10**  
**Sanger sequencing results of *wcaJ* PCR amplicons of P24-resistant mutants isolated *in vivo***

| Mutants | Insert sequence | Insertion nucleotide position<br>(numbered from the start codon) | IS Family | DR (Direct repeat) |
|---------|-----------------|------------------------------------------------------------------|-----------|--------------------|
| W1      | IS903B          | 1207                                                             | IS5       | -                  |
| W2      | ISKpn26         | 627                                                              | IS5       | CTAA               |
| W3      | ISKpn14         | 1238                                                             | IS1       | -                  |
| W4      | ISKpn14         | 1238                                                             | IS1       | -                  |
| W5      | IS903B          | 295                                                              | IS5       | -                  |
| W6      | IS903B          | 295                                                              | IS5       | -                  |
| W7      | IS903B          | 1207                                                             | IS5       | -                  |
| W8      | ISKpn26         | 509                                                              | IS5       | TTAG               |
| W9      | ISKpn26         | 902                                                              | IS5       | TTAA               |
| W10     | IS903B          | 1196                                                             | IS5       | -                  |
| W11     | ISKpn26         | 1146                                                             | IS5       | CTAG               |
| W12     | IS903B          | 1207                                                             | IS5       | -                  |
| W13     | ISKpn14         | 1238                                                             | IS1       | -                  |
| W14     | ISKpn26         | 1146                                                             | IS5       | CTAG               |
| W15     | ISKpn26         | 936                                                              | IS5       | TTAG               |
| W16     | ISKpn26         | 413                                                              | IS5       | CTAA               |
| W17     | ISKpn26         | 936                                                              | IS5       | TTAG               |
| W18     | IS903B          | 275                                                              | IS5       | -                  |
| W19     | ISKpn26         | 690                                                              | IS5       | CTAA               |
| W20     | ISKpn26         | 1361                                                             | IS5       | CTAA               |

**Supplementary Table 11**  
**SNPs between the ST11 CRKP strains using in this study to determine phage host ranges.**

| Snp*-dists<br>0.7.0 | 0151 | 0153 | 0155 | 0155 | 0157 | 0157 | 0200 | 0200 | 0200 | 0200 | 0200 | 0201 | 0905 |
|---------------------|------|------|------|------|------|------|------|------|------|------|------|------|------|
| 015134 (B0)         | 0    | 55   | 224  | 59   | 72   | 11   | 16   | 83   | 46   | 165  | 72   | 66   | 72   |
| 015318              | 55   | 0    | 242  | 16   | 90   | 61   | 57   | 100  | 62   | 182  | 91   | 85   | 89   |
| 015581              | 224  | 242  | 0    | 246  | 221  | 231  | 227  | 230  | 234  | 89   | 221  | 213  | 257  |
| 015584              | 59   | 16   | 246  | 0    | 93   | 65   | 61   | 104  | 65   | 186  | 95   | 89   | 93   |
| 015712              | 72   | 90   | 221  | 93   | 0    | 78   | 73   | 66   | 82   | 163  | 67   | 47   | 104  |
| 015785              | 11   | 61   | 231  | 65   | 78   | 0    | 23   | 89   | 53   | 169  | 78   | 70   | 79   |
| 020003              | 16   | 57   | 227  | 61   | 73   | 23   | 0    | 85   | 48   | 167  | 74   | 67   | 74   |
| 020030              | 83   | 100  | 230  | 104  | 66   | 89   | 85   | 0    | 93   | 171  | 77   | 61   | 115  |
| 020037              | 46   | 62   | 234  | 65   | 82   | 53   | 48   | 93   | 0    | 175  | 82   | 76   | 82   |
| 020046              | 165  | 182  | 89   | 186  | 163  | 169  | 167  | 171  | 175  | 0    | 163  | 159  | 197  |
| 020058              | 72   | 91   | 221  | 95   | 67   | 78   | 74   | 77   | 82   | 163  | 0    | 59   | 104  |
| 020143              | 66   | 85   | 213  | 89   | 47   | 70   | 67   | 61   | 76   | 159  | 59   | 0    | 98   |
| 090527              | 72   | 89   | 257  | 93   | 104  | 79   | 74   | 115  | 82   | 197  | 104  | 98   | 0    |

\*SNPs between the genome sequence of ST11 CRKP were identified using Snippy v4.6.0 (<https://github.com/tseemann/snippy>)



**Supplementary Table 12**  
**Primers used for amplification and sequencing**

| Primer         | Sequence (5'→3')                        |
|----------------|-----------------------------------------|
| mshA-F-SacI    | AAC <u>GAGCTC</u> ATGAAGAAAACAATATTTG   |
| mshA-R-HindIII | AAC <u>AAGCTT</u> TTTATTTAAGATTATTGAGA  |
| wcaJ-F-SacI    | AAC <u>GAGCTC</u> ATGAAAACTTTCACGCA     |
| wcaJ-R-HindIII | AAC <u>AAGCTT</u> TTCAATATGCAGACTTATTAA |
| epsJ-F-SacI    | AAC <u>GAGCTC</u> GTTGTCGATCAAACGGTTAT  |
| epsJ-R-EcoRV   | AACGATATC <u>TTACATTTT</u> CCTCGTGATTAA |
| pdeC-F-SacI    | AAC <u>GAGCTC</u> CCTGTCGGATGTCAGCT     |
| pdeC-R-HindIII | AAC <u>AAGCTT</u> TCAGATCTCCGCGTG       |
| M13R           | GTAAAACGACGGCCAGT                       |
| M13F           | CAGGAAACAGCTATGACC                      |
| dfrA-F         | ATGAACTCGGAATCAGTACG                    |
| dfrA-R         | TTAGCCGTTTCGACG                         |

<sup>a</sup>Restriction sites are underlined.
