# Supplementary material for: Characterization of phage resistance and phages capable of intestinal decolonization of carbapenem-resistant Klebsiella pneumoniae in mice
Source: PubMed Central journal article supplement (PMC8758719; doi:10.1038/s42003-022-03001-y), 2022-01-13
Supplement: 42003_2022_3001_MOESM2_ESM.pdf [file 42003_2022_3001_MOESM2_ESM.pdf]

## Description of Additional Supplementary Files

**File name:** Supplementary Data 1

**Description:** Source results of Fig. 2.

**File name:** Supplementary Data 2

**Description:** Source results of Fig. 4.

**File name:** Supplementary Data 3

**Description:** Source results of Fig. 8.

**File name:** Supplementary Data 4

**Description:** Source results of Supplementary Figure 1.
